# Supplementary material for: The HIV oligonucleotide database (HIVoligoDB)
Source: Oxford University Press journal article supplement (doi:10.1093/database/bax005), 2017-01-01
Supplement: bax005_Supp.pdf [file bax005_Supp.pdf]

---

*Supplementary data*

**The HIV oligonucleotide database (HIVoligoDB)**

João Carneiro, Adriana Resende and Filipe Pereira

Interdisciplinary Centre of Marine and Environmental Research (CIIMAR), University of Porto, Porto, Portugal.

---



Supplementary Figure S2: Localization of oligonucleotides (arrows) in the HIV-1 (A) and HIV-2 (B) reference genomes.

A

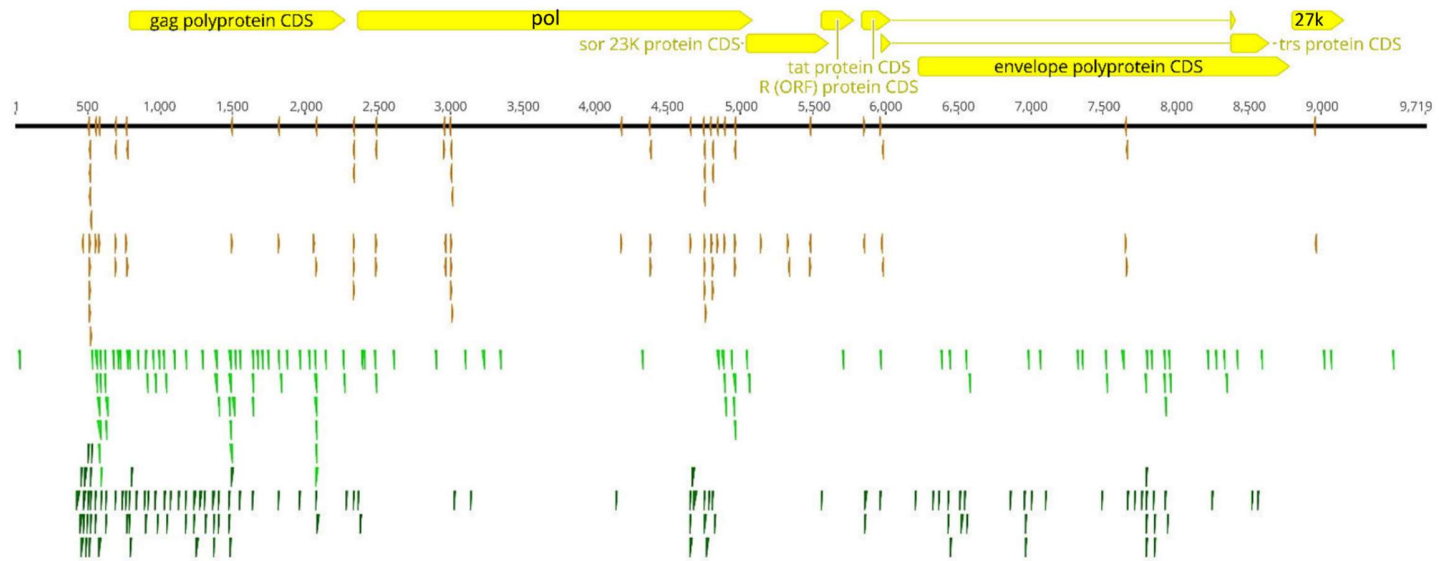

B

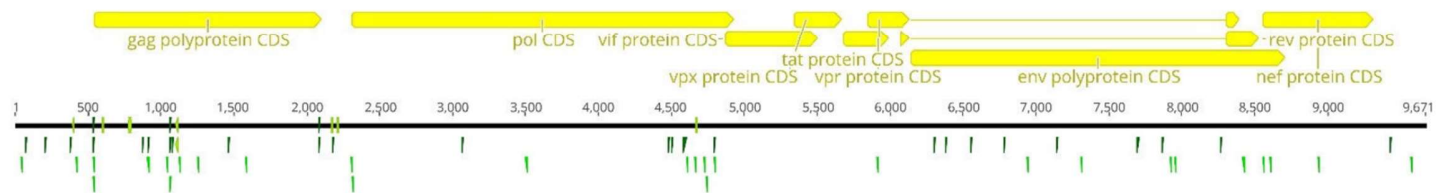

Supplementary Figure S3: HIV scores estimated in each HIV-1 and HIV-2 genomic region. The mean is represented by Xs and outliers are represented by dots.

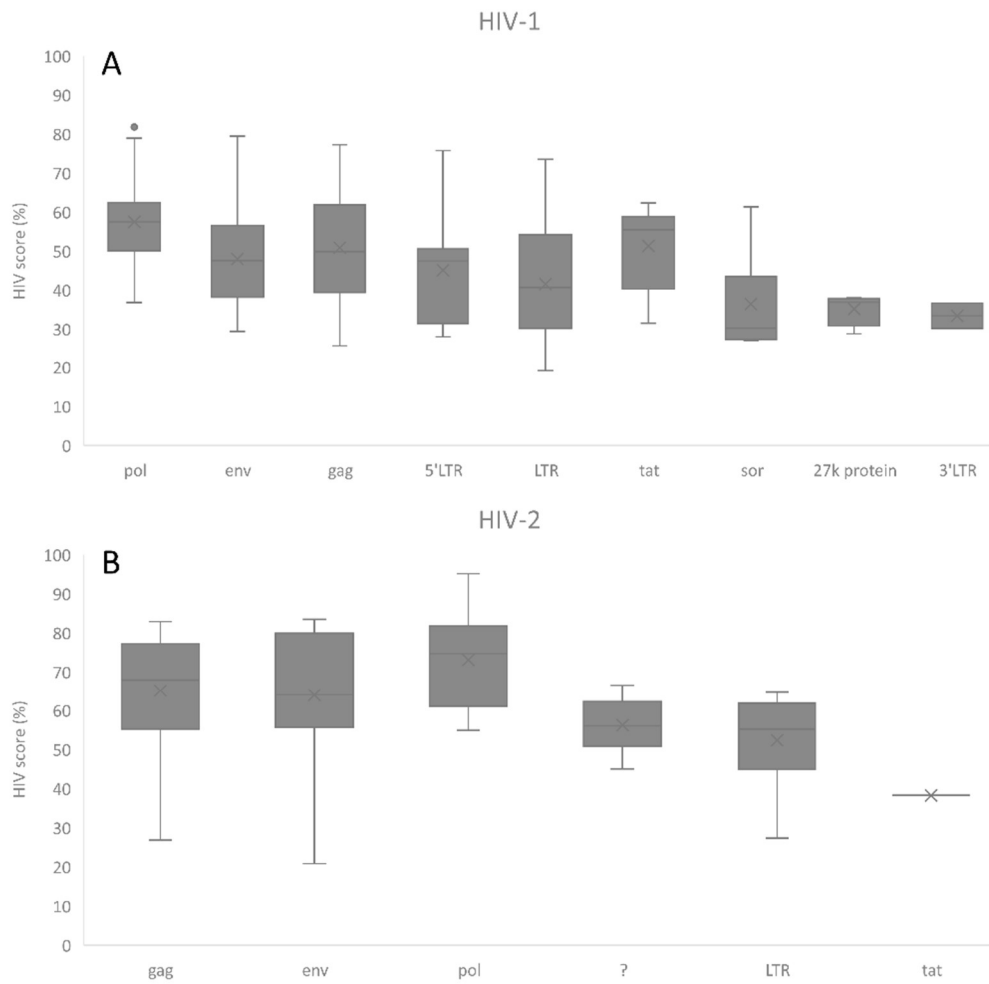

Supplementary Figure S4: Genetic diversity across the HIV-1 and HIV-2 genomes. The plots display the percentage of identical sites (PIS) and percentage of pairwise identity (PPI) in a sliding window analysis (30 nt windows with 1 nt of overlap) estimated in multiple sequence alignments with complete or near complete genome sequences of HIV-1 and HIV-2.

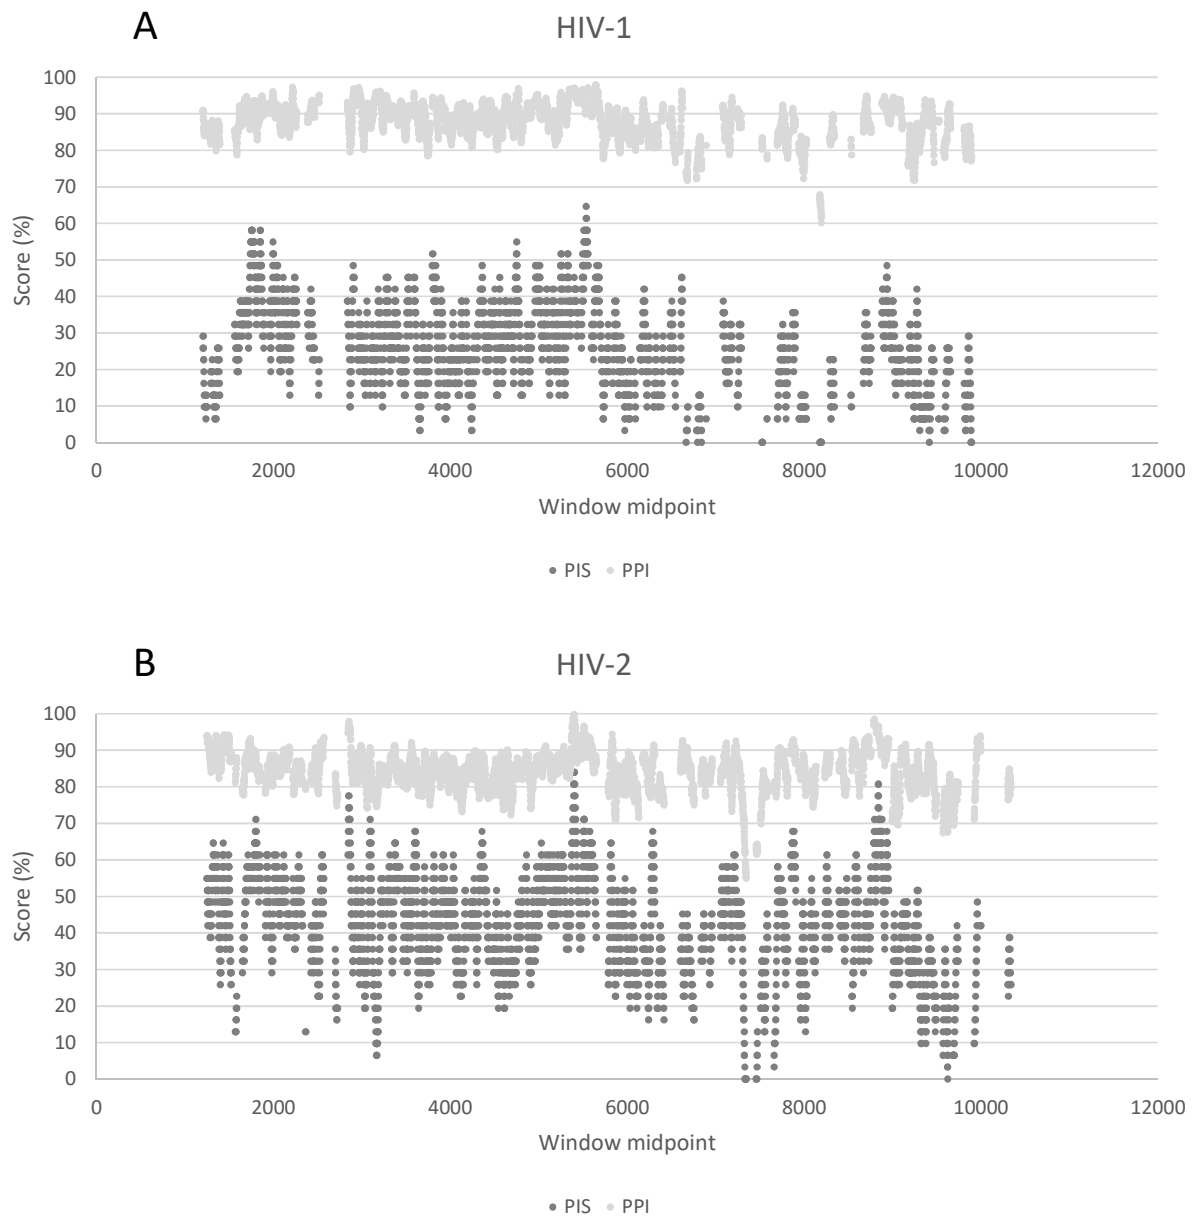

Supplementary Figure S5: HIV-1 genomic regions determined with the sliding window method (30 nucleotides with step of 1 nucleotide) that present the highest percentage of identical sites (PIS) and percentage of pairwise identity (PPI) values.

| <b>Genome Position</b> | <b>PIS (%)</b> |
|------------------------|----------------|
| 5524-5554              | 64.52          |
| 5523-5553              | 61.29          |
| 5525-5555              | 61.29          |
| 5526-5556              | 61.29          |
| 5527-5557              | 61.29          |
| 5529-5559              | 61.29          |
| 5530-5560              | 61.29          |
| 1738-1768              | 58.06          |
| 1739-1769              | 58.06          |
| 1741-1771              | 58.06          |
|                        | PPI (%)        |
| 5631-5661              | 97.72          |
| 5636-5666              | 97.72          |
| 5632-5662              | 97.68          |
| 5634-5664              | 97.68          |
| 5635-5665              | 97.68          |
| 5633-5663              | 97.65          |
| 2204-2234              | 97.18          |
| 2953-2983              | 97.1           |
| 2952-2982              | 97.06          |
| 5544-5574              | 97.01          |
